# Supplementary material for: Content Disputes in Wikipedia Reflect Geopolitical Instability
Source: PubMed Central journal article supplement (PMC3120813; doi:10.1371/journal.pone.0020902), 2011-06-22
Supplement: pone.0020902.s006.pdf [file pone.0020902.s006.pdf]

| Code | Name                | Total number of linked pages (N) | Number of disputed pages (D) | Fraction disputed (N/D) | Wikipedia dispute index (WDI) | Weighted N | Weighted D | Weighted N/D | Weighted WDI |
|------|---------------------|----------------------------------|------------------------------|-------------------------|-------------------------------|------------|------------|--------------|--------------|
| USA  | United States       | 526233                           | 1782                         | 0.00339                 | -0.34237                      | 377150.752 | 997.425    | 0.00264      | 0.03451      |
| GBR  | United Kingdom      | 184578                           | 699                          | 0.00379                 | -0.23054                      | 113993.438 | 253.517    | 0.00222      | -0.13873     |
| IND  | India               | 91315                            | 582                          | 0.00637                 | 0.29004                       | 60538.848  | 303.132    | 0.00501      | 0.67286      |
| FRA  | France              | 160753                           | 465                          | 0.00289                 | -0.49995                      | 90542.486  | 114.143    | 0.00126      | -0.70639     |
| CAN  | Canada              | 137926                           | 464                          | 0.00336                 | -0.34895                      | 84927.687  | 191.443    | 0.00225      | -0.12523     |
| DEU  | Germany             | 137200                           | 457                          | 0.00333                 | -0.35887                      | 69721.142  | 122.858    | 0.00176      | -0.37149     |
| AUS  | Australia           | 118235                           | 359                          | 0.00304                 | -0.45147                      | 60161.903  | 123.865    | 0.00206      | -0.21587     |
| JPN  | Japan               | 101528                           | 314                          | 0.00309                 | -0.43306                      | 59406.566  | 96.801     | 0.00163      | -0.44977     |
| ITA  | Italy               | 96061                            | 312                          | 0.00325                 | -0.3841                       | 46082.011  | 75.707     | 0.00164      | -0.44157     |
| ISR  | Israel              | 28635                            | 291                          | 0.01016                 | 0.75658                       | 11032.929  | 82.992     | 0.00752      | 1.07984      |
| RUS  | Russia              | 66371                            | 277                          | 0.00417                 | -0.13336                      | 28251.25   | 61.008     | 0.00216      | -0.16816     |
| PAK  | Pakistan            | 35300                            | 259                          | 0.00734                 | 0.43083                       | 11627.897  | 87.355     | 0.00751      | 1.07855      |
| ESP  | Spain               | 72349                            | 249                          | 0.00344                 | -0.32616                      | 29522.882  | 54.559     | 0.00185      | -0.32391     |
| IRN  | Iran                | 20621                            | 217                          | 0.01052                 | 0.79147                       | 9260.846   | 54.119     | 0.00584      | 0.82736      |
| TUR  | Turkey              | 29242                            | 216                          | 0.00739                 | 0.43756                       | 10772.406  | 40.886     | 0.0038       | 0.39578      |
| IRQ  | Iraq                | 14125                            | 216                          | 0.01529                 | 1.16522                       | 4733.532   | 50.225     | 0.01061      | 1.42382      |
| EGY  | Egypt               | 21085                            | 205                          | 0.00972                 | 0.71233                       | 7501.915   | 47.231     | 0.0063       | 0.90188      |
| BRA  | Brazil              | 56526                            | 205                          | 0.00363                 | -0.27381                      | 26525.29   | 42.885     | 0.00162      | -0.4576      |
| AFG  | Afghanistan         | 12699                            | 204                          | 0.01606                 | 1.21448                       | 4751.237   | 51.443     | 0.01083      | 1.44404      |
| NLD  | Netherlands         | 51687                            | 193                          | 0.00373                 | -0.24463                      | 20634.01   | 35.732     | 0.00173      | -0.38892     |
| MEX  | Mexico              | 41785                            | 174                          | 0.00416                 | -0.1356                       | 19536.7    | 48.01      | 0.00246      | -0.03891     |
| CHN  | China               | 29935                            | 173                          | 0.00578                 | 0.19215                       | 12641.523  | 46.523     | 0.00368      | 0.36494      |
| PHL  | Philippines         | 27874                            | 170                          | 0.0061                  | 0.24599                       | 14072.304  | 58.971     | 0.00419      | 0.49482      |
| CHE  | Switzerland         | 42367                            | 166                          | 0.00392                 | -0.1965                       | 16501.897  | 33.504     | 0.00203      | -0.22983     |
| CUB  | Cuba                | 15152                            | 164                          | 0.01082                 | 0.81962                       | 5525.877   | 38.769     | 0.00702      | 1.01015      |
| POL  | Poland              | 97018                            | 159                          | 0.00164                 | -1.06811                      | 66924.448  | 40.628     | 6.07E-04     | -1.43713     |
| SWE  | Sweden              | 57103                            | 158                          | 0.00277                 | -0.54438                      | 23427.387  | 38.096     | 0.00163      | -0.45181     |
| ZAF  | South Africa        | 36784                            | 149                          | 0.00405                 | -0.16323                      | 15434.923  | 40.683     | 0.00264      | 0.03116      |
| SYR  | Syria               | 10010                            | 149                          | 0.01489                 | 1.13825                       | 3012.397   | 27.631     | 0.00917      | 1.27817      |
| GRC  | Greece              | 36321                            | 149                          | 0.0041                  | -0.15057                      | 12019.106  | 41.138     | 0.00342      | 0.29242      |
| SAU  | Saudi Arabia        | 8529                             | 143                          | 0.01677                 | 1.25726                       | 2338.056   | 27.553     | 0.01178      | 1.52876      |
| NZL  | New Zealand         | 45315                            | 139                          | 0.00307                 | -0.44128                      | 22054.834  | 38.744     | 0.00176      | -0.37457     |
| BEL  | Belgium             | 37182                            | 139                          | 0.00374                 | -0.24347                      | 12713.63   | 25.426     | 0.002        | -0.24493     |
| AUT  | Austria             | 37802                            | 133                          | 0.00352                 | -0.30413                      | 13787.457  | 26.88      | 0.00195      | -0.27041     |
| NOR  | Norway              | 42628                            | 130                          | 0.00305                 | -0.44709                      | 21329.218  | 19.795     | 9.28E-04     | -1.01269     |
| ARG  | Argentina           | 37521                            | 129                          | 0.00344                 | -0.3272                       | 14323.844  | 20.187     | 0.00141      | -0.5949      |
| DNK  | Denmark             | 29957                            | 128                          | 0.00427                 | -0.10985                      | 11371.17   | 22.312     | 0.00196      | -0.26399     |
| KOR  | South Korea         | 21875                            | 124                          | 0.00567                 | 0.17282                       | 8981.025   | 31.391     | 0.0035       | 0.31339      |
| SGP  | Singapore           | 17793                            | 121                          | 0.0068                  | 0.35487                       | 6189.9     | 30.268     | 0.00489      | 0.64915      |
| PRT  | Portugal            | 27323                            | 121                          | 0.00443                 | -0.07405                      | 9331.582   | 22.234     | 0.00238      | -0.06981     |
| LBN  | Lebanon             | 9046                             | 121                          | 0.01338                 | 1.03135                       | 2797.932   | 25.109     | 0.00897      | 1.25634      |
| MYS  | Malaysia            | 20021                            | 114                          | 0.00569                 | 0.1773                        | 8400.226   | 30.373     | 0.00362      | 0.34727      |
| HKG  | Hong Kong           | 22268                            | 114                          | 0.00512                 | 0.07093                       | 9778.95    | 37.679     | 0.00385      | 0.41085      |
| UKR  | Ukraine             | 22894                            | 104                          | 0.00454                 | -0.0486                       | 8433.713   | 26.84      | 0.00318      | 0.21962      |
| HUN  | Hungary             | 26594                            | 102                          | 0.00384                 | -0.21783                      | 10589.622  | 18.555     | 0.00175      | -0.37715     |
| IDN  | Indonesia           | 20776                            | 100                          | 0.00481                 | 0.00926                       | 7704.554   | 17.086     | 0.00222      | -0.14155     |
| ROU  | Romania             | 36313                            | 98                           | 0.0027                  | -0.56932                      | 20607.906  | 20.84      | 0.00101      | -0.92681     |
| THA  | Thailand            | 19663                            | 95                           | 0.00483                 | 0.01302                       | 7059.18    | 24.521     | 0.00347      | 0.30717      |
| SRB  | Serbia              | 19681                            | 94                           | 0.00478                 | 0.00153                       | 8786.514   | 19.658     | 0.00224      | -0.13273     |
| IRL  | Republic of Ireland | 22259                            | 90                           | 0.00404                 | -0.16505                      | 11513.579  | 33.015     | 0.00287      | 0.11542      |

|     |                        |       |    |         |          |           |        |          |          |
|-----|------------------------|-------|----|---------|----------|-----------|--------|----------|----------|
| FIN | Finland                | 30981 | 88 | 0.00284 | -0.51815 | 11780.785 | 12.93  | 0.0011   | -0.84492 |
| CHL | Chile                  | 18913 | 87 | 0.0046  | -0.03606 | 6267.771  | 17.037 | 0.00272  | 0.06195  |
| VEN | Venezuela              | 15856 | 85 | 0.00536 | 0.11699  | 5406.721  | 19.432 | 0.00359  | 0.34123  |
| LKA | Sri Lanka              | 11478 | 85 | 0.00741 | 0.4401   | 5758.932  | 30.333 | 0.00527  | 0.72348  |
| COL | Colombia               | 19087 | 85 | 0.00445 | -0.06847 | 7119.358  | 21.391 | 0.003    | 0.16211  |
| VNM | Vietnam                | 13846 | 84 | 0.00607 | 0.2407   | 5904.295  | 18.21  | 0.00308  | 0.18824  |
| GEO | Georgia (country)      | 8140  | 82 | 0.01007 | 0.74781  | 2798.772  | 18.447 | 0.00659  | 0.94772  |
| BGD | Bangladesh             | 9292  | 82 | 0.00882 | 0.61545  | 4453.326  | 27.892 | 0.00626  | 0.89667  |
| BGR | Bulgaria               | 18754 | 81 | 0.00432 | -0.09907 | 7501.204  | 18.099 | 0.00241  | -0.05724 |
| JOR | Jordan                 | 5706  | 80 | 0.01402 | 1.07839  | 1523.969  | 10.245 | 0.00672  | 0.96742  |
| MAR | Morocco                | 11228 | 78 | 0.00695 | 0.37618  | 3479.366  | 14.145 | 0.00407  | 0.46447  |
| PRK | North Korea            | 5242  | 76 | 0.0145  | 1.11191  | 1577.192  | 14.523 | 0.00921  | 1.28204  |
| ETH | Ethiopia               | 8695  | 72 | 0.00828 | 0.5518   | 3288.584  | 14.646 | 0.00445  | 0.55569  |
| CZE | Czech Republic         | 29450 | 71 | 0.00241 | -0.68213 | 13054.637 | 13.449 | 0.00103  | -0.90827 |
| HRV | Croatia                | 17645 | 69 | 0.00391 | -0.19846 | 6032.172  | 12.935 | 0.00214  | -0.17522 |
| YEM | Yemen                  | 4714  | 67 | 0.01421 | 1.09204  | 2067.494  | 11.298 | 0.00546  | 0.76022  |
| KWT | Kuwait                 | 4560  | 66 | 0.01447 | 1.11022  | 1121.047  | 9.338  | 0.00833  | 1.18179  |
| CYP | Cyprus                 | 8982  | 65 | 0.00724 | 0.41705  | 3131.238  | 10.98  | 0.00351  | 0.31665  |
| BIH | Bosnia and Herzegovina | 9087  | 65 | 0.00715 | 0.40543  | 3562.983  | 10.961 | 0.00308  | 0.18572  |
| kos | Kosovo                 | 3764  | 64 | 0.017   | 1.27129  | 1054.728  | 13.361 | 0.01267  | 1.60105  |
| TWN | Republic of China      | 7153  | 64 | 0.00895 | 0.62924  | 2511.839  | 12.218 | 0.00486  | 0.6439   |
| LBY | Libya                  | 5439  | 62 | 0.0114  | 0.87142  | 1445.958  | 6.357  | 0.0044   | 0.54277  |
| NGA | Nigeria                | 13818 | 61 | 0.00441 | -0.07721 | 5914.062  | 13.926 | 0.00235  | -0.08159 |
| DZA | Algeria                | 9766  | 61 | 0.00625 | 0.26985  | 3986.024  | 10.405 | 0.00261  | 0.0215   |
| ALB | Albania                | 8008  | 61 | 0.00762 | 0.46832  | 2795.484  | 10.646 | 0.00381  | 0.39917  |
| ARM | Armenia                | 8584  | 58 | 0.00676 | 0.34843  | 3715.475  | 11.63  | 0.00313  | 0.20306  |
| PER | Peru                   | 18239 | 55 | 0.00302 | -0.45834 | 7546.161  | 10.156 | 0.00135  | -0.64096 |
| NIC | Nicaragua              | 4980  | 55 | 0.01104 | 0.83979  | 1514.92   | 9.049  | 0.00597  | 0.84924  |
| KHM | Cambodia               | 5747  | 54 | 0.0094  | 0.67819  | 2018.997  | 10.019 | 0.00496  | 0.66385  |
| AZE | Azerbaijan             | 10982 | 53 | 0.00483 | 0.01192  | 6977.979  | 10.254 | 0.00147  | -0.55308 |
| SDN | Sudan                  | 6107  | 52 | 0.00851 | 0.57969  | 1768.535  | 10.5   | 0.00594  | 0.84325  |
| LTU | Lithuania              | 10628 | 52 | 0.00489 | 0.02564  | 3852.756  | 6.857  | 0.00178  | -0.36154 |
| GHA | Ghana                  | 7162  | 52 | 0.00726 | 0.42034  | 2505.354  | 8.769  | 0.0035   | 0.31472  |
| NPL | Nepal                  | 10322 | 51 | 0.00494 | 0.03543  | 6824.944  | 17.382 | 0.00255  | -0.00319 |
| ARE | United Arab Emirates   | 6742  | 51 | 0.00756 | 0.46135  | 2170.139  | 13.294 | 0.00613  | 0.87448  |
| TUN | Tunisia                | 6547  | 50 | 0.00764 | 0.4709   | 1825.877  | 5.647  | 0.00309  | 0.1911   |
| SVK | Slovakia               | 15983 | 49 | 0.00307 | -0.44182 | 6418.341  | 9.88   | 0.00154  | -0.50669 |
| PRI | Puerto Rico            | 10747 | 49 | 0.00456 | -0.04492 | 4449.545  | 18.015 | 0.00405  | 0.4604   |
| MMR | Burma                  | 6003  | 48 | 0.008   | 0.51683  | 2774.38   | 7.379  | 0.00266  | 0.04015  |
| KEN | Kenya                  | 12296 | 47 | 0.00382 | -0.22124 | 5576.834  | 9.374  | 0.00168  | -0.4187  |
| JAM | Jamaica                | 8914  | 47 | 0.00527 | 0.10041  | 3644.951  | 13.897 | 0.00381  | 0.4003   |
| HTI | Haiti                  | 5109  | 47 | 0.0092  | 0.65703  | 1815.943  | 10.597 | 0.00584  | 0.82595  |
| EST | Estonia                | 11129 | 46 | 0.00413 | -0.14303 | 4953.248  | 8.157  | 0.00165  | -0.43917 |
| BLR | Belarus                | 10760 | 46 | 0.00428 | -0.10931 | 3259.874  | 8.354  | 0.00256  | 0.00299  |
| QAT | Qatar                  | 4197  | 45 | 0.01072 | 0.81018  | 926.72    | 5.96   | 0.00643  | 0.9232   |
| ECU | Ecuador                | 13158 | 45 | 0.00342 | -0.33248 | 5579.144  | 8.118  | 0.00146  | -0.56299 |
| UZB | Uzbekistan             | 5055  | 44 | 0.0087  | 0.6017   | 1187.173  | 6.478  | 0.00546  | 0.75887  |
| GTM | Guatemala              | 6163  | 44 | 0.00714 | 0.40351  | 2161.933  | 7.549  | 0.00349  | 0.31235  |
| BOL | Bolivia                | 8619  | 43 | 0.00499 | 0.04512  | 3216.287  | 6.164  | 0.00192  | -0.28749 |
| ZWE | Zimbabwe               | 8294  | 42 | 0.00506 | 0.06002  | 2571.699  | 11.914 | 0.00463  | 0.5951   |
| MLT | Malta                  | 6762  | 42 | 0.00621 | 0.26424  | 2278.481  | 8.342  | 0.00366  | 0.35972  |
| ISL | Iceland                | 9465  | 42 | 0.00444 | -0.07205 | 3459.835  | 5.823  | 0.00168  | -0.41739 |
| SVN | Slovenia               | 16077 | 41 | 0.00255 | -0.62593 | 7283.918  | 5.097  | 7.00E-04 | -1.29498 |
| PRY | Paraguay               | 6465  | 41 | 0.00634 | 0.28505  | 1748.782  | 8.833  | 0.00505  | 0.68154  |

|                                  |                                  |       |    |         |          |          |        |          |          |
|----------------------------------|----------------------------------|-------|----|---------|----------|----------|--------|----------|----------|
| LVA                              | Latvia                           | 10651 | 41 | 0.00385 | -0.2142  | 3427.173 | 5.5    | 0.0016   | -0.46504 |
| CRI                              | Costa Rica                       | 6804  | 41 | 0.00603 | 0.23395  | 2349.543 | 11.092 | 0.00472  | 0.61395  |
| MNE                              | Montenegro                       | 4856  | 40 | 0.00824 | 0.54655  | 1550.058 | 4.85   | 0.00313  | 0.20257  |
| BHR                              | Bahrain                          | 3194  | 40 | 0.01252 | 0.96549  | 743.397  | 7.318  | 0.00984  | 1.34884  |
| DOM                              | Dominican Republic               | 6525  | 39 | 0.00598 | 0.22581  | 2588.172 | 8.69   | 0.00336  | 0.27325  |
| pal                              | Palestinian territories          | 2188  | 38 | 0.01737 | 1.29248  | 1000.053 | 10.364 | 0.01036  | 1.40023  |
| MKD                              | Republic of Macedonia            | 5635  | 38 | 0.00674 | 0.34647  | 1877.238 | 6.215  | 0.00331  | 0.25909  |
| URY                              | Uruguay                          | 8605  | 37 | 0.0043  | -0.10354 | 2423.273 | 5.151  | 0.00213  | -0.18394 |
| SLV                              | El Salvador                      | 4642  | 37 | 0.00797 | 0.51366  | 1558.824 | 8.152  | 0.00523  | 0.71634  |
| KAZ                              | Kazakhstan                       | 7478  | 36 | 0.00481 | 0.00944  | 2245.096 | 5.321  | 0.00237  | -0.07516 |
| UGA                              | Uganda                           | 6401  | 34 | 0.00531 | 0.10779  | 2099.572 | 6.129  | 0.00292  | 0.13334  |
| HND                              | Honduras                         | 5200  | 34 | 0.00654 | 0.31559  | 1754.937 | 7.722  | 0.0044   | 0.54367  |
| PAN                              | Panama                           | 7432  | 32 | 0.00431 | -0.10217 | 2504.501 | 4.938  | 0.00197  | -0.25921 |
| SOM                              | Somalia                          | 4273  | 31 | 0.00725 | 0.41956  | 1157.636 | 4.431  | 0.00383  | 0.40417  |
| LAO                              | Laos                             | 4184  | 31 | 0.00741 | 0.4406   | 1258.367 | 8.958  | 0.00712  | 1.02473  |
| TZA                              | Tanzania                         | 7867  | 29 | 0.00369 | -0.2575  | 3266.995 | 4.622  | 0.00141  | -0.59099 |
| LUX                              | Luxembourg                       | 7553  | 28 | 0.00371 | -0.25186 | 2372.938 | 3.472  | 0.00146  | -0.55739 |
| TJK                              | Tajikistan                       | 2907  | 26 | 0.00894 | 0.62886  | 994.883  | 2.994  | 0.00301  | 0.16364  |
| PNG                              | Papua New Guinea                 | 5147  | 26 | 0.00505 | 0.05757  | 2581.631 | 5.709  | 0.00221  | -0.14438 |
| GUY                              | Guyana                           | 3509  | 24 | 0.00684 | 0.36061  | 1138.612 | 4.095  | 0.0036   | 0.34199  |
| COD                              | Democratic Republic of the Congo | 5455  | 24 | 0.0044  | -0.08059 | 1687.131 | 2.515  | 0.00149  | -0.5386  |
| AGO                              | Angola                           | 5397  | 24 | 0.00445 | -0.0699  | 1546.173 | 3.458  | 0.00224  | -0.13315 |
| RWA                              | Rwanda                           | 3077  | 23 | 0.00747 | 0.44942  | 770.133  | 3.16   | 0.0041   | 0.47361  |
| BRB                              | Barbados                         | 3213  | 23 | 0.00716 | 0.40617  | 1161.934 | 7.46   | 0.00642  | 0.92148  |
| SEN                              | Senegal                          | 5306  | 22 | 0.00415 | -0.13991 | 1555.413 | 4.797  | 0.00308  | 0.18818  |
| MNG                              | Mongolia                         | 4434  | 22 | 0.00496 | 0.03962  | 1847.456 | 3.463  | 0.00187  | -0.30969 |
| MAC                              | Macau                            | 3760  | 22 | 0.00585 | 0.20451  | 925.321  | 3.171  | 0.00343  | 0.29361  |
| KGZ                              | Kyrgyzstan                       | 3181  | 22 | 0.00692 | 0.37173  | 1319.256 | 2.423  | 0.00184  | -0.33029 |
| ERI                              | Eritrea                          | 2202  | 22 | 0.00999 | 0.73956  | 675.229  | 4.45   | 0.00659  | 0.94764  |
| cat                              | Catalonia                        | 4490  | 21 | 0.00468 | -0.01945 | 1908.65  | 5.879  | 0.00308  | 0.18694  |
| OMN                              | Oman                             | 2733  | 21 | 0.00768 | 0.47701  | 646.425  | 1.519  | 0.00235  | -0.08378 |
| MDA                              | Moldova                          | 4977  | 21 | 0.00422 | -0.12242 | 2282.079 | 3.868  | 0.0017   | -0.41031 |
| Countries with D below threshold |                                  |       |    |         |          |          |        |          |          |
| TTO                              | Trinidad and Tobago              | 4182  | 20 | 0.00478 | 0.00283  | 1479.718 | 4.897  | 0.00331  | 0.25882  |
| MDG                              | Madagascar                       | 6853  | 20 | 0.00292 | -0.49107 | 4043.001 | 3.321  | 8.22E-04 | -1.13461 |
| abk                              | Abkhazia                         | 1027  | 19 | 0.0185  | 1.35568  | 294.403  | 3.234  | 0.01099  | 1.4586   |
| MOZ                              | Mozambique                       | 4494  | 19 | 0.00423 | -0.12042 | 1342.216 | 2.737  | 0.00204  | -0.22539 |
| MDV                              | Maldives                         | 1953  | 19 | 0.00973 | 0.71296  | 798.977  | 4.966  | 0.00622  | 0.88904  |
| MCO                              | Monaco                           | 3817  | 19 | 0.00498 | 0.04286  | 901.939  | 3.297  | 0.00366  | 0.35825  |
| FJI                              | Fiji                             | 4506  | 19 | 0.00422 | -0.12309 | 1820.666 | 2.579  | 0.00142  | -0.59001 |
| ZMB                              | Zambia                           | 4411  | 18 | 0.00408 | -0.15585 | 1250.894 | 3.246  | 0.00259  | 0.0154   |
| TKM                              | Turkmenistan                     | 2462  | 18 | 0.00731 | 0.42728  | 661.737  | 2.254  | 0.00341  | 0.28772  |
| CMR                              | Cameroon                         | 6646  | 17 | 0.00256 | -0.62292 | 2271.064 | 1.762  | 7.76E-04 | -1.19169 |
| BTN                              | Bhutan                           | 2306  | 17 | 0.00737 | 0.43558  | 821.107  | 4.968  | 0.00605  | 0.86205  |
| BRN                              | Brunei                           | 2442  | 17 | 0.00696 | 0.37828  | 593.354  | 2.386  | 0.00402  | 0.45372  |
| GUM                              | Guam                             | 4205  | 16 | 0.0038  | -0.2258  | 1361.137 | 3.489  | 0.00256  | 0.00318  |
| SLE                              | Sierra Leone                     | 3760  | 15 | 0.00399 | -0.17848 | 1186.473 | 4.829  | 0.00407  | 0.46571  |
| LBR                              | Liberia                          | 3510  | 15 | 0.00427 | -0.10968 | 1118.102 | 2.391  | 0.00214  | -0.17776 |
| CIV                              | Ivory Coast                      | 4333  | 15 | 0.00346 | -0.32033 | 1910.907 | 1.796  | 9.40E-04 | -0.9999  |
| BDI                              | Burundi                          | 2364  | 15 | 0.00635 | 0.28558  | 618.754  | 3.777  | 0.0061   | 0.87104  |
| LIE                              | Liechtenstein                    | 1806  | 14 | 0.00775 | 0.48583  | 477.819  | 1.253  | 0.00262  | 0.02634  |
| IMN                              | Isle of Man                      | 2983  | 14 | 0.00469 | -0.01599 | 1604.072 | 5.125  | 0.0032   | 0.22362  |
| GIB                              | Gibraltar                        | 3856  | 14 | 0.00363 | -0.27269 | 1113.579 | 2.015  | 0.00181  | -0.34475 |

|     |                                      |      |    |         |          |          |       |          |          |
|-----|--------------------------------------|------|----|---------|----------|----------|-------|----------|----------|
| VAT | Vatican City                         | 1835 | 13 | 0.00708 | 0.39579  | 697.004  | 3.229 | 0.00463  | 0.59504  |
| MWI | Malawi                               | 2826 | 13 | 0.0046  | -0.03603 | 886.303  | 0.913 | 0.00103  | -0.9085  |
| BLZ | Belize                               | 2522 | 13 | 0.00515 | 0.07778  | 808.167  | 1.865 | 0.00231  | -0.10202 |
| gal | Galicia (Spain)                      | 2278 | 12 | 0.00527 | 0.09949  | 907.788  | 3.38  | 0.00372  | 0.37651  |
| MUS | Mauritius                            | 3109 | 12 | 0.00386 | -0.21151 | 1017.654 | 3.333 | 0.00328  | 0.24841  |
| CYM | Cayman Islands                       | 1237 | 12 | 0.0097  | 0.7101   | 298.686  | 5.376 | 0.018    | 1.95226  |
| NCL | New Caledonia                        | 2617 | 11 | 0.0042  | -0.12625 | 943.585  | 2.472 | 0.00262  | 0.0249   |
| MRT | Mauritania                           | 2037 | 11 | 0.0054  | 0.1243   | 624.063  | 0.901 | 0.00144  | -0.57076 |
| BWA | Botswana                             | 3055 | 11 | 0.0036  | -0.281   | 1005.086 | 1.814 | 0.00181  | -0.34739 |
| TLS | East Timor                           | 1975 | 10 | 0.00506 | 0.0599   | 454.341  | 0.835 | 0.00184  | -0.32892 |
| TGO | Togo                                 | 3146 | 10 | 0.00318 | -0.40566 | 1169.606 | 0.823 | 7.04E-04 | -1.2895  |
| SLB | Solomon Islands                      | 3078 | 10 | 0.00325 | -0.38381 | 1135.37  | 1.445 | 0.00127  | -0.69709 |
| NAM | Namibia                              | 4400 | 10 | 0.00227 | -0.74114 | 1646.167 | 1.025 | 6.23E-04 | -1.41195 |
| CPV | Cape Verde                           | 2419 | 10 | 0.00413 | -0.14288 | 881.646  | 0.971 | 0.0011   | -0.84183 |
| BMU | Bermuda                              | 4035 | 10 | 0.00248 | -0.65454 | 1479.463 | 1.887 | 0.00128  | -0.69487 |
| BHS | The Bahamas                          | 2519 | 10 | 0.00397 | -0.18339 | 586.337  | 2.854 | 0.00487  | 0.64454  |
| GIN | Guinea                               | 3312 | 9  | 0.00272 | -0.56244 | 1046.196 | 2.015 | 0.00193  | -0.28281 |
| GAB | Gabon                                | 2875 | 9  | 0.00313 | -0.42094 | 790.446  | 0.916 | 0.00116  | -0.79074 |
| FLK | Falkland Islands<br>Nagorno-Karabakh | 1520 | 9  | 0.00592 | 0.2164   | 523.232  | 1.644 | 0.00314  | 0.20709  |
| nkr | Republic                             | 753  | 8  | 0.01062 | 0.80102  | 151.78   | 1.949 | 0.01284  | 1.61474  |
| NER | Niger                                | 2442 | 8  | 0.00328 | -0.37549 | 871.884  | 0.504 | 5.78E-04 | -1.48557 |
| MNP | Northern Mariana<br>Islands          | 1165 | 8  | 0.00687 | 0.3646   | 238.323  | 1.913 | 0.00803  | 1.14475  |
| LSO | Lesotho                              | 1509 | 8  | 0.0053  | 0.10588  | 559.367  | 1.394 | 0.00249  | -0.02454 |
| tra | Transnistria                         | 686  | 7  | 0.0102  | 0.76067  | 244.324  | 1.335 | 0.00546  | 0.76013  |
| SUR | Suriname                             | 2452 | 7  | 0.00285 | -0.51311 | 735.126  | 1.347 | 0.00183  | -0.33259 |
| JEY | Jersey                               | 1766 | 7  | 0.00396 | -0.18492 | 681.39   | 2.924 | 0.00429  | 0.51842  |
| GRD | Grenada                              | 1676 | 7  | 0.00418 | -0.13262 | 511.045  | 1.49  | 0.00292  | 0.13198  |
| GNQ | Equatorial Guinea                    | 1819 | 7  | 0.00385 | -0.21449 | 440.373  | 0.388 | 8.82E-04 | -1.06367 |
| GGY | Guernsey                             | 1284 | 7  | 0.00545 | 0.13381  | 440.353  | 1.704 | 0.00387  | 0.41508  |
| FRO | Faroe Islands                        | 2085 | 7  | 0.00336 | -0.35097 | 759.327  | 1.564 | 0.00206  | -0.21515 |
| CAF | Central African Republic             | 2237 | 7  | 0.00313 | -0.42134 | 627.895  | 1.102 | 0.00176  | -0.37539 |
| AND | Andorra                              | 1457 | 7  | 0.0048  | 0.00742  | 430.878  | 1.041 | 0.00242  | -0.05588 |
| bas | Basque Country<br>(autonomous        | 1527 | 6  | 0.00393 | -0.19366 | 592.431  | 0.942 | 0.00159  | -0.47461 |
| WSM | Samoa                                | 2452 | 6  | 0.00245 | -0.66726 | 911.571  | 1.829 | 0.00201  | -0.24167 |
| VUT | Vanuatu                              | 1358 | 6  | 0.00442 | -0.07637 | 487.572  | 0.935 | 0.00192  | -0.28643 |
| VCT | Saint Vincent and the<br>Grenadines  | 1005 | 6  | 0.00597 | 0.22466  | 282.884  | 2.487 | 0.00879  | 1.2356   |
| MSR | Montserrat                           | 931  | 6  | 0.00644 | 0.30114  | 221.155  | 1.243 | 0.00562  | 0.78814  |
| COG | Republic of the Congo                | 2363 | 6  | 0.00254 | -0.63029 | 631.331  | 0.64  | 0.00101  | -0.92362 |
| BFA | Burkina Faso                         | 4830 | 6  | 0.00124 | -1.3452  | 3031.884 | 1.361 | 4.49E-04 | -1.73914 |
| ATG | Antigua and Barbuda                  | 1105 | 6  | 0.00543 | 0.1298   | 310.053  | 2.194 | 0.00708  | 1.01869  |
| ANT | Netherlands Antilles                 | 1420 | 6  | 0.00423 | -0.12101 | 311.118  | 0.384 | 0.00123  | -0.72717 |
| ncy | Northern Cyprus                      | 686  | 5  | 0.00729 | 0.4242   | 129.509  | 0.825 | 0.00637  | 0.91361  |
| VGB | British Virgin Islands               | 1097 | 5  | 0.00456 | -0.04526 | 275.802  | 1.904 | 0.0069   | 0.99381  |
| TON | Tonga                                | 1916 | 5  | 0.00261 | -0.60292 | 649.537  | 0.513 | 7.90E-04 | -1.17382 |
| TCD | Chad                                 | 2477 | 5  | 0.00202 | -0.85973 | 759.84   | 0.868 | 0.00114  | -0.80535 |
| TCA | Turks and Caicos Islands             | 985  | 5  | 0.00508 | 0.06244  | 173.869  | 0.342 | 0.00197  | -0.26248 |
| SYC | Seychelles                           | 1604 | 5  | 0.00312 | -0.42518 | 540.117  | 0.682 | 0.00126  | -0.70515 |
| STP | Sao Tome and Principe                | 940  | 5  | 0.00532 | 0.1092   | 353.408  | 0.325 | 9.20E-04 | -1.02089 |
| MLI | Mali                                 | 4407 | 5  | 0.00113 | -1.43587 | 1791.425 | 0.464 | 2.59E-04 | -2.28809 |
| GRL | Greenland                            | 3318 | 5  | 0.00151 | -1.15204 | 1362.243 | 0.446 | 3.27E-04 | -2.05529 |
| GMB | The Gambia                           | 1307 | 5  | 0.00383 | -0.22041 | 453.118  | 0.492 | 0.00109  | -0.85592 |

|     |                                                 |      |   |         |          |         |       |          |          |
|-----|-------------------------------------------------|------|---|---------|----------|---------|-------|----------|----------|
| DMA | Dominica                                        | 1318 | 5 | 0.00379 | -0.22879 | 451.094 | 1.767 | 0.00392  | 0.42715  |
| DJI | Djibouti                                        | 1386 | 5 | 0.00361 | -0.2791  | 291.888 | 0.538 | 0.00184  | -0.32734 |
| BEN | Benin                                           | 2597 | 5 | 0.00193 | -0.90703 | 870.662 | 0.53  | 6.08E-04 | -1.43484 |
| TUV | Tuvalu                                          | 905  | 4 | 0.00442 | -0.076   | 221.921 | 0.282 | 0.00127  | -0.69885 |
| SMR | San Marino                                      | 1614 | 4 | 0.00248 | -0.65454 | 394.652 | 0.351 | 8.90E-04 | -1.05419 |
| PYF | French Polynesia                                | 1632 | 4 | 0.00245 | -0.66563 | 726.343 | 0.295 | 4.07E-04 | -1.83778 |
| PLW | Palau                                           | 1680 | 4 | 0.00238 | -0.69462 | 435.568 | 0.232 | 5.32E-04 | -1.5693  |
| PCN | Pitcairn Islands                                | 854  | 4 | 0.00468 | -0.018   | 128.294 | 0.225 | 0.00175  | -0.37596 |
| NRU | Nauru                                           | 832  | 4 | 0.00481 | 0.0081   | 225.973 | 0.441 | 0.00195  | -0.27021 |
| LCA | Saint Lucia                                     | 1108 | 4 | 0.00361 | -0.27838 | 388.72  | 0.9   | 0.00232  | -0.09849 |
| GNB | Guinea-Bissau                                   | 1487 | 4 | 0.00269 | -0.57258 | 335.718 | 1.161 | 0.00346  | 0.30292  |
| FSM | Federated States of<br>Micronesia               | 726  | 4 | 0.00551 | 0.14438  | 199.808 | 0.336 | 0.00168  | -0.41967 |
| AIA | Anguilla                                        | 806  | 4 | 0.00496 | 0.03985  | 197.786 | 1.12  | 0.00566  | 0.79614  |
| ABW | Aruba                                           | 1253 | 4 | 0.00319 | -0.40136 | 332.024 | 0.351 | 0.00106  | -0.88297 |
| aad | Akrotiri and Dhekelia                           | 277  | 3 | 0.01083 | 0.82023  | 25.093  | 0.269 | 0.01073  | 1.43473  |
| WLF | Wallis and Futuna                               | 630  | 3 | 0.00476 | -0.00147 | 98.72   | 0.157 | 0.00159  | -0.47224 |
| VIR | United States Virgin<br>Islands                 | 1108 | 3 | 0.00271 | -0.56606 | 348.467 | 0.427 | 0.00123  | -0.73496 |
| SWZ | Swaziland                                       | 1604 | 3 | 0.00187 | -0.936   | 445.97  | 0.694 | 0.00156  | -0.49516 |
| SPM | Saint Pierre and<br>Miquelon                    | 672  | 3 | 0.00446 | -0.06601 | 105.86  | 0.169 | 0.0016   | -0.46911 |
| SGS | South Georgia and the<br>South Sandwich Islands | 732  | 3 | 0.0041  | -0.15153 | 328.853 | 0.101 | 3.06E-04 | -2.12242 |
| NFK | Norfolk Island                                  | 1054 | 3 | 0.00285 | -0.5161  | 280.223 | 0.355 | 0.00127  | -0.70216 |
| KNA | Saint Kitts and Nevis                           | 843  | 3 | 0.00356 | -0.29271 | 230.848 | 1.3   | 0.00563  | 0.79034  |
| COM | Comoros                                         | 981  | 3 | 0.00306 | -0.44432 | 313.207 | 0.185 | 5.90E-04 | -1.46603 |
| COK | Cook Islands                                    | 1268 | 3 | 0.00237 | -0.70094 | 393.978 | 0.638 | 0.00162  | -0.45583 |
| chr | Christmas Island                                | 758  | 2 | 0.00264 | -0.5919  | 245.607 | 0.216 | 8.79E-04 | -1.0669  |
| MHL | Marshall Islands                                | 1873 | 2 | 0.00107 | -1.49651 | 535.374 | 0.077 | 1.44E-04 | -2.87818 |
| KIR | Kiribati                                        | 815  | 2 | 0.00245 | -0.6644  | 262.591 | 0.085 | 3.25E-04 | -2.06064 |
| IOT | British Indian Ocean<br>Territory               | 390  | 2 | 0.00513 | 0.07264  | 52.63   | 0.07  | 0.00134  | -0.6485  |
| coc | Cocos (Keeling) Islands                         | 580  | 1 | 0.00172 | -1.01739 | 88.426  | 0.083 | 9.42E-04 | -0.99734 |
| NIU | Niue                                            | 681  | 1 | 0.00147 | -1.17792 | 140.267 | 0.071 | 5.09E-04 | -1.61288 |
| TKL | Tokelau                                         | 426  | 0 | 0       | 0        | 105.137 | 0     | 0        | 0        |
| HMD | Heard Island and<br>McDonald Islands            | 153  | 0 | 0       | 0        | 59.965  | 0     | 0        | 0        |
