# Supplementary material for: Content Disputes in Wikipedia Reflect Geopolitical Instability
Source: PLoS One. 2011 Jun 22;6(6):e20902. doi: 10.1371/journal.pone.0020902 (PMC3120813; doi:10.1371/journal.pone.0020902)
Supplement: Table S2 — Correlation values comparing the Wikipedia dispute index (WDI; red) to components of the World Bank Policy Research Aggregate Governance Indicators[13] (yellow) and b) the Economist Intelligence Unit 2009 political instability index [14] (blue). Five separate tables are shown (sheets in the Excel file) for successively higher values of the minimum number of disputes required for inclusion (D) to demonstrate how correlation improves with stringency. The WDI considered is that for Sep 12 2008, which lies roughly between the dates of the other indicators. The numbers of countries included for each minimum value are: 118 (D< = 20), 71 (50), 42 (100), 26 (150), 17 (200). wWDI denotes the weighted value of the index discussed in the legend to Table S1. (PDF) [file pone.0020902.s007.pdf]

[illegible]

[illegible]

[illegible]

[illegible]

[illegible]
